# Supplementary material for: Novel dual inhibitors of PARP and HDAC induce intratumoral STING-mediated antitumor immunity in triple-negative breast cancer
Source: PubMed Central journal article supplement (PMC10770036; doi:10.1038/s41419-023-06303-z), 2024-01-05

Figure 3A

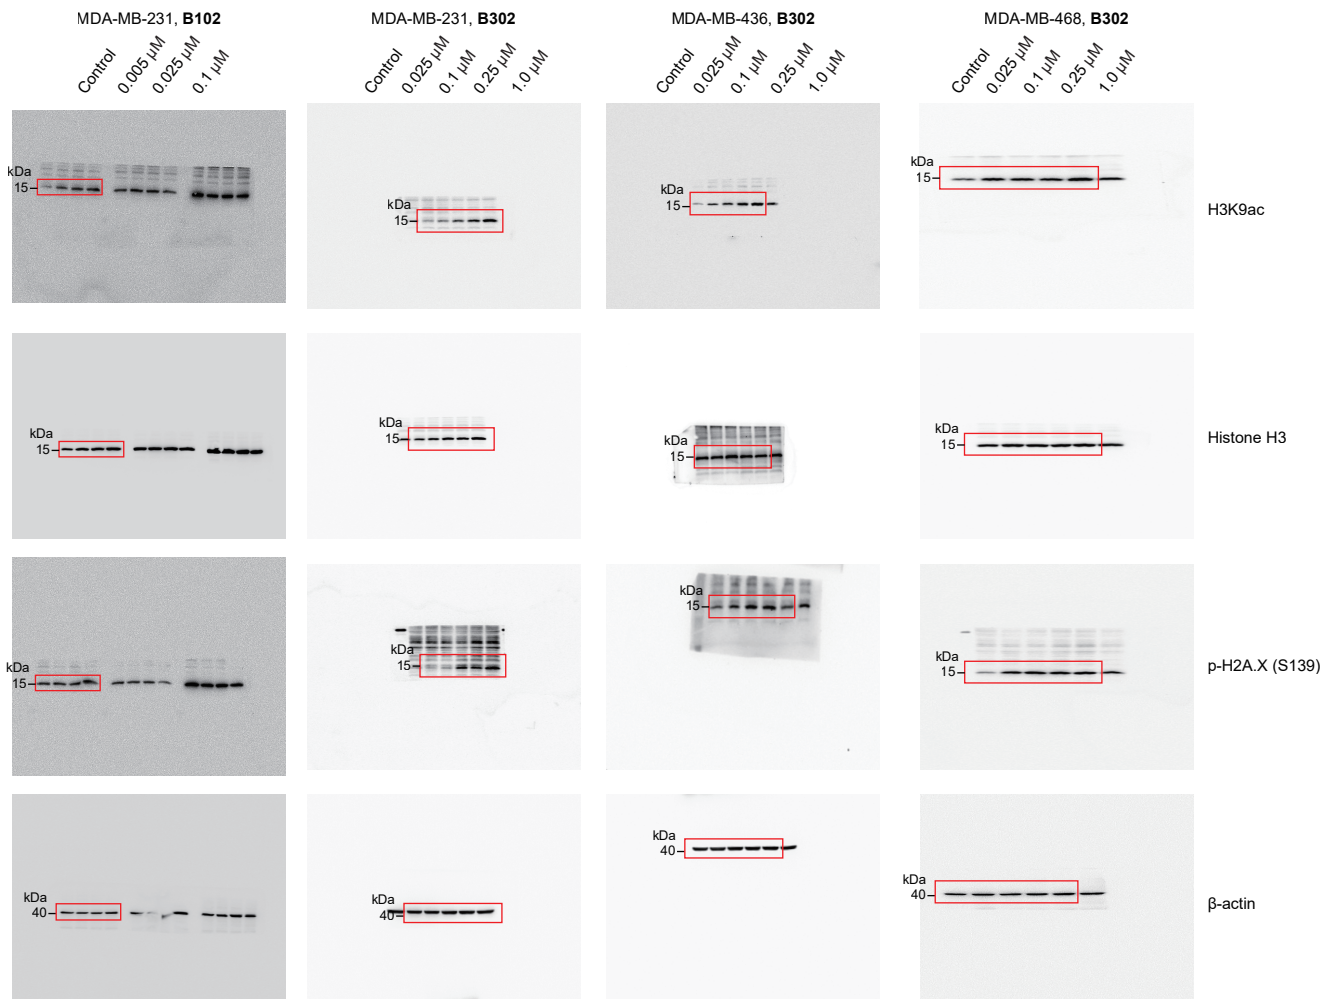

Figure 3C

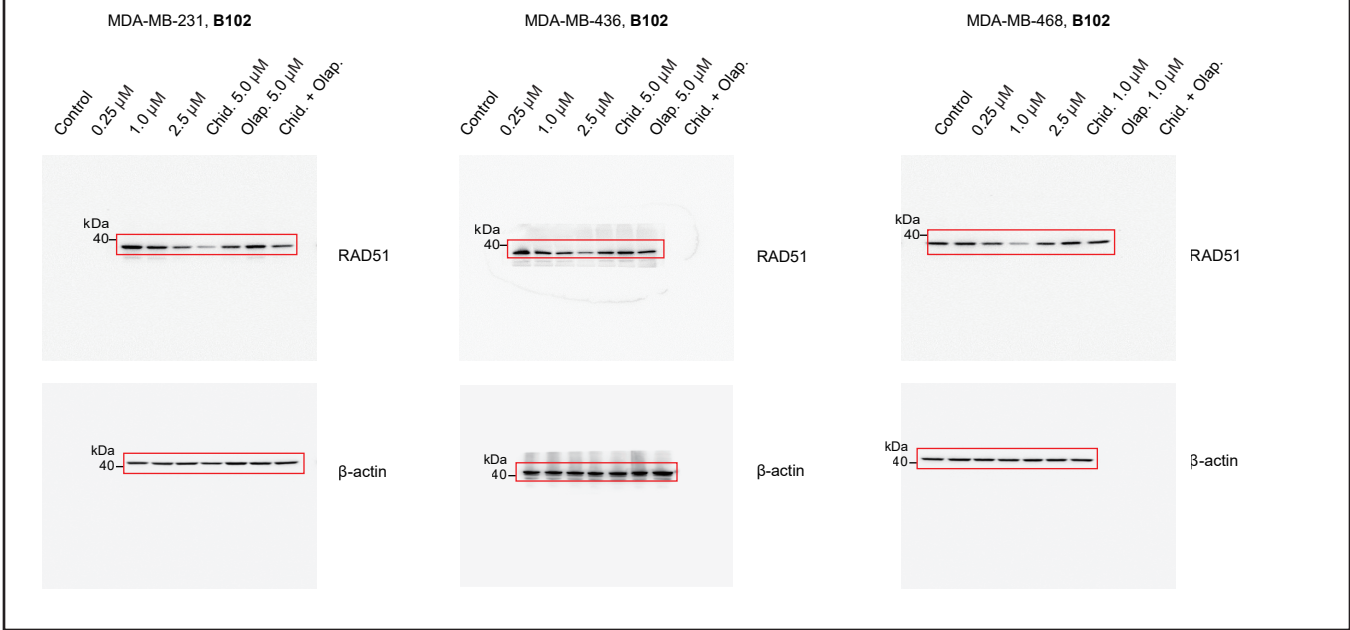

Figure 3D

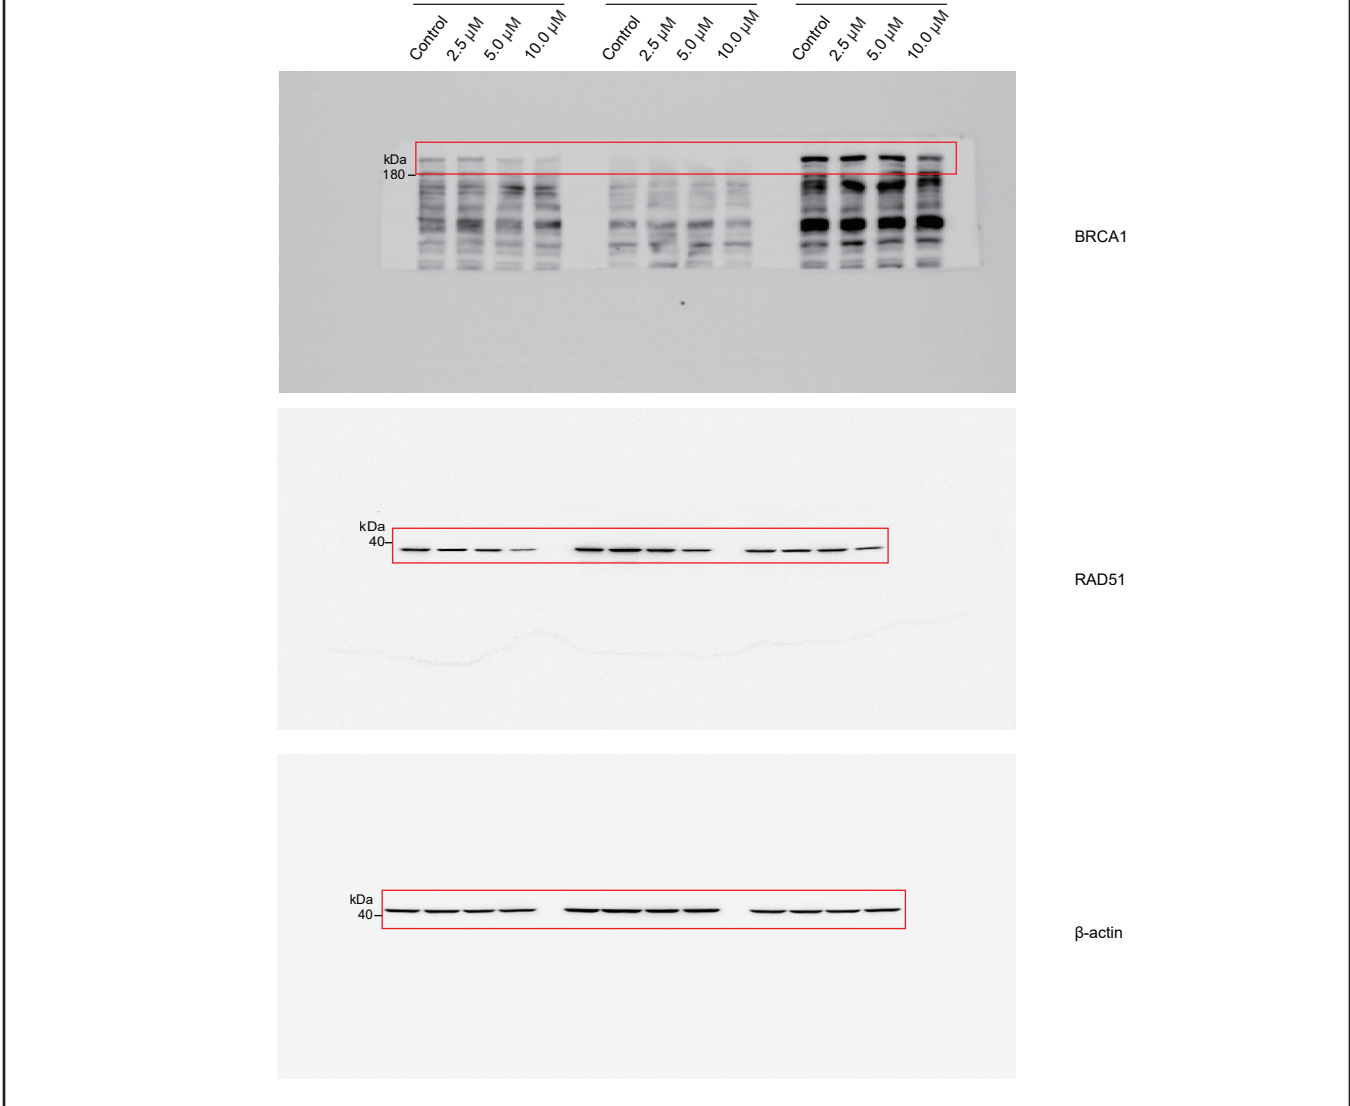

Figure 3J  
B102

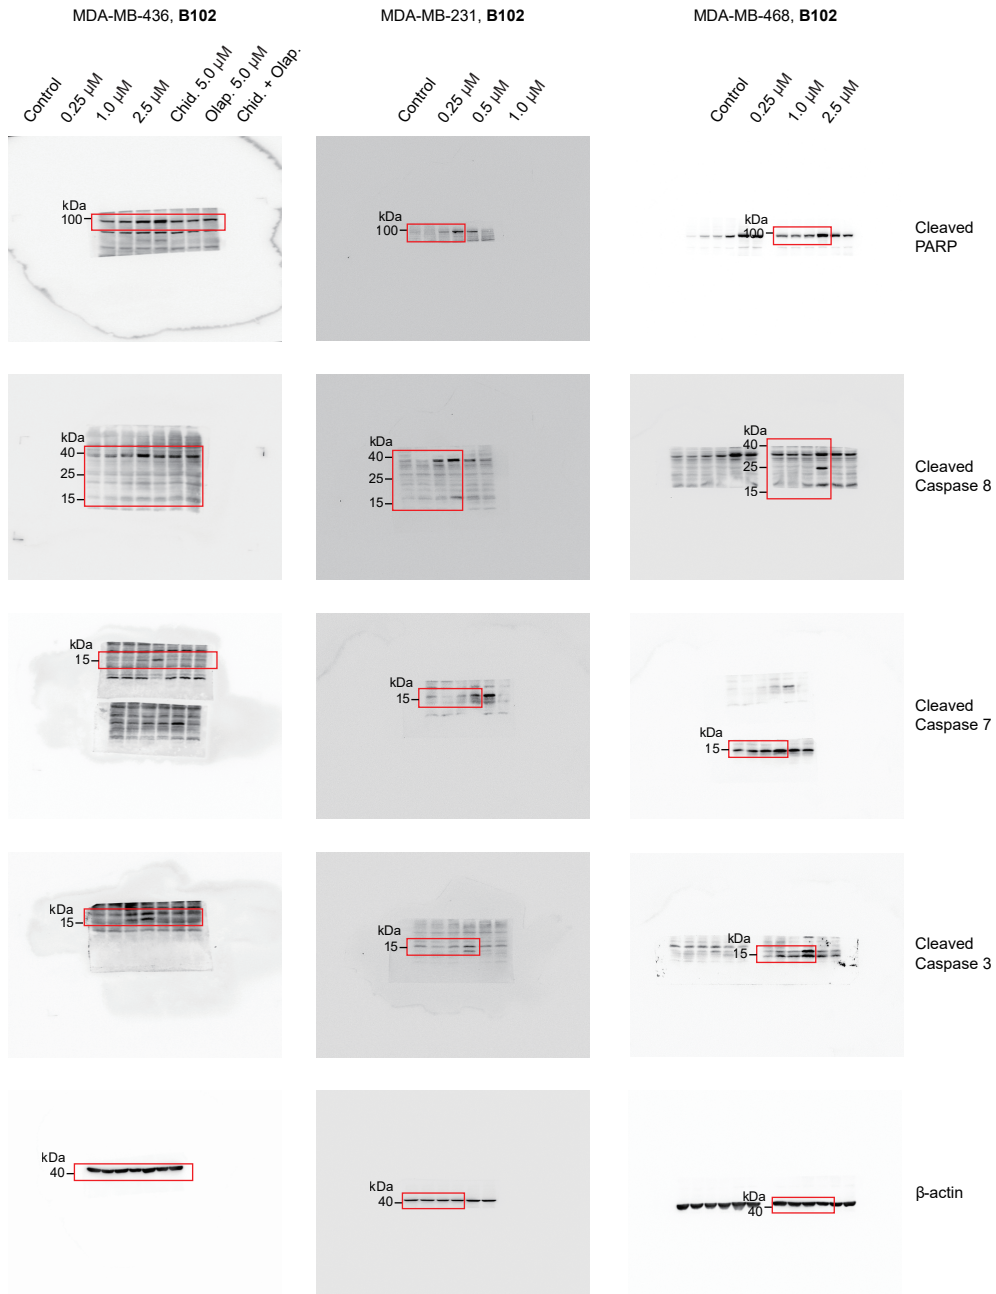

Figure 3J  
B302

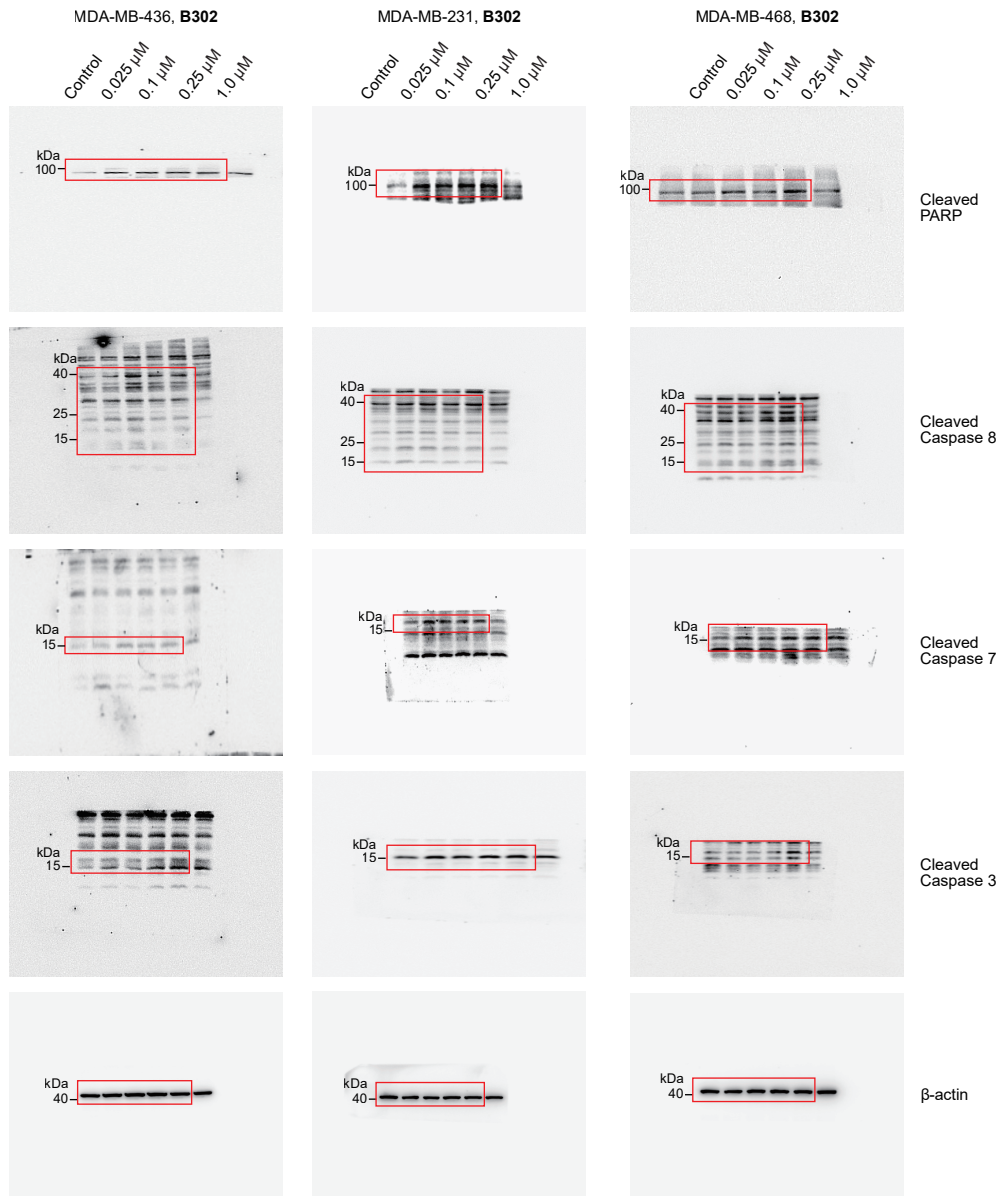



Figure 4G

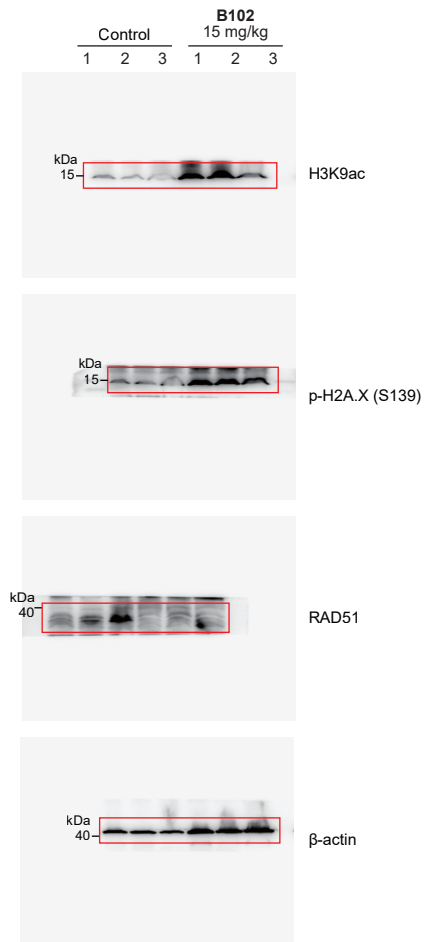

Figure 5C

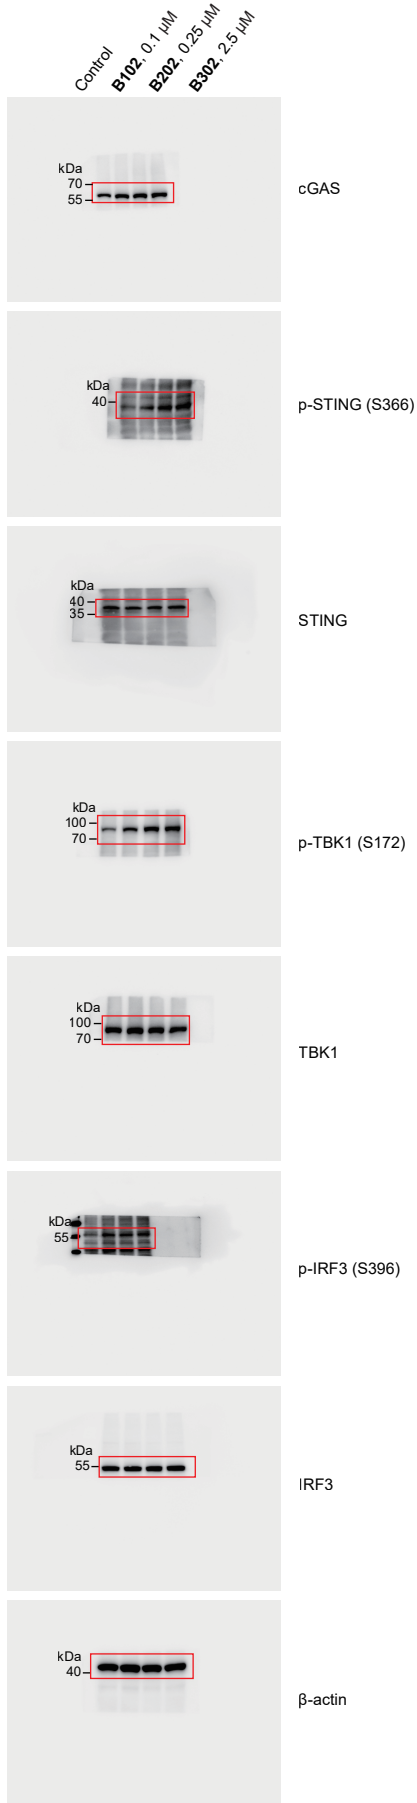

Figure 5D

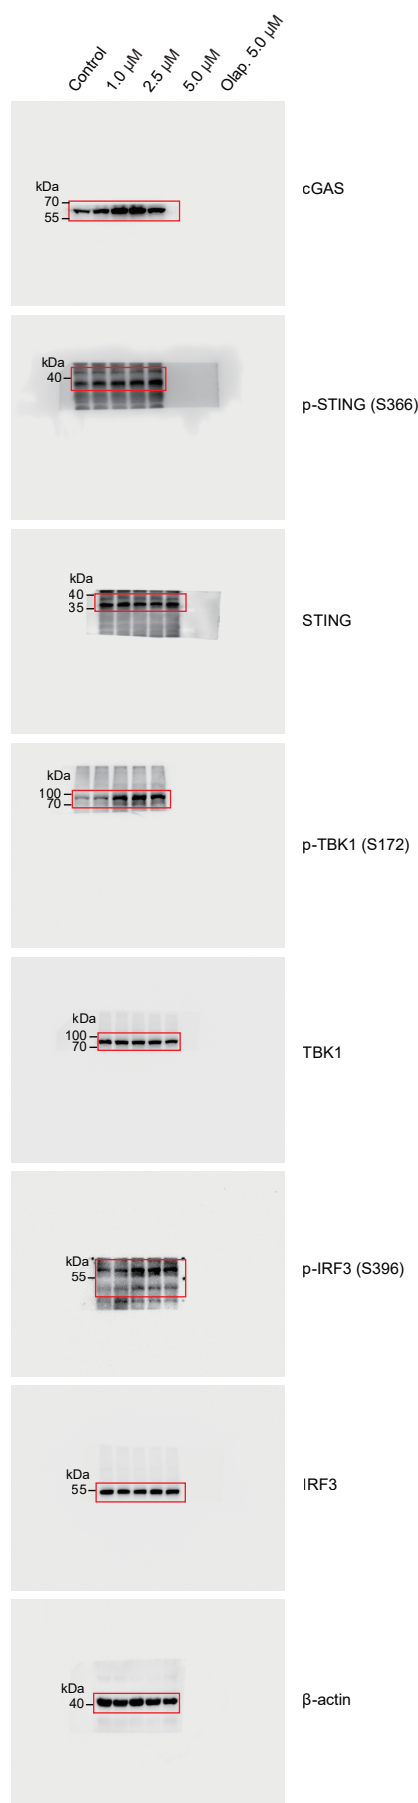

Figure 5F

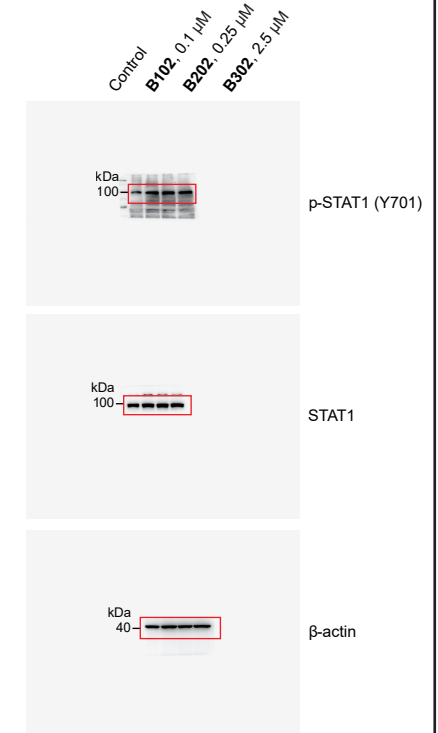

Figure 6F

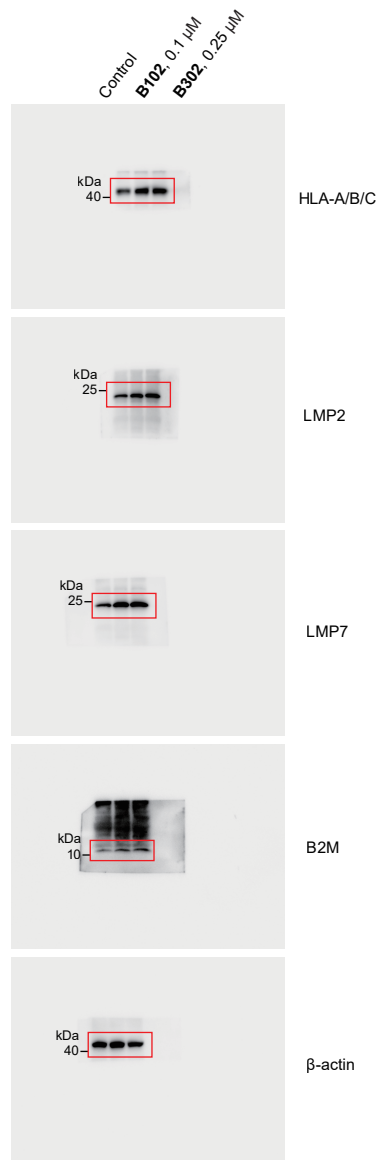

Figure 6H

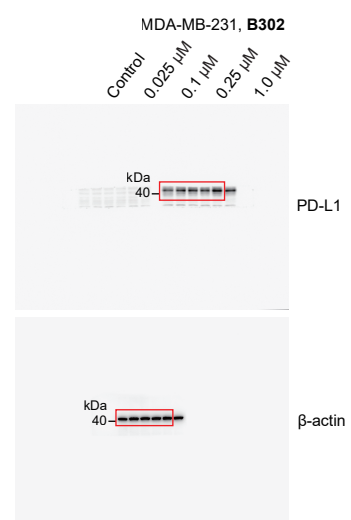

Figure S1F

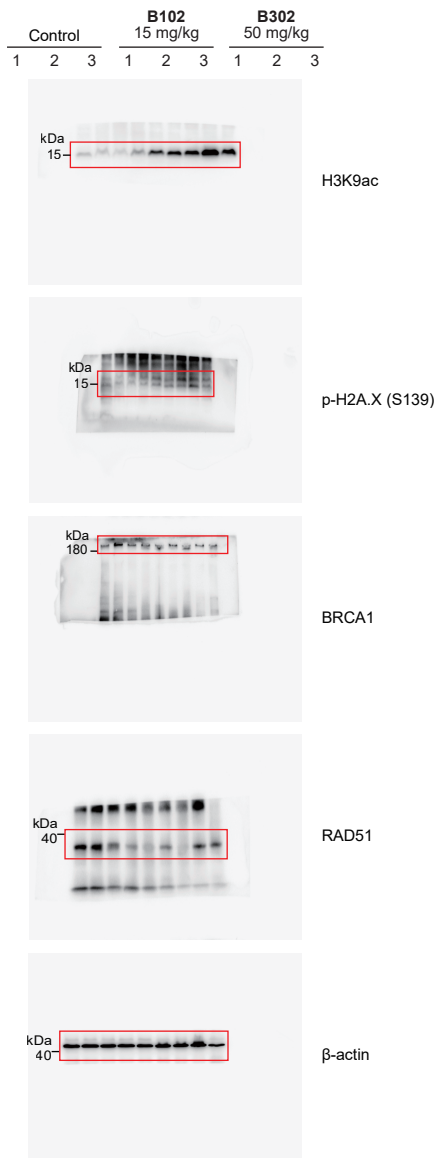

Figure S3G

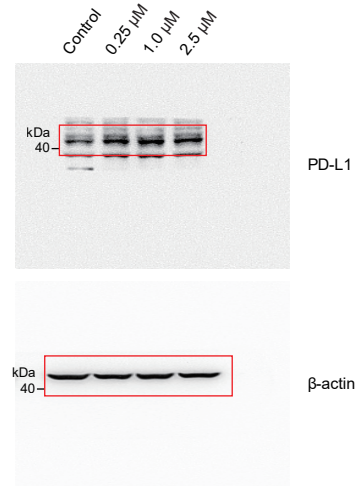

Figure S3H

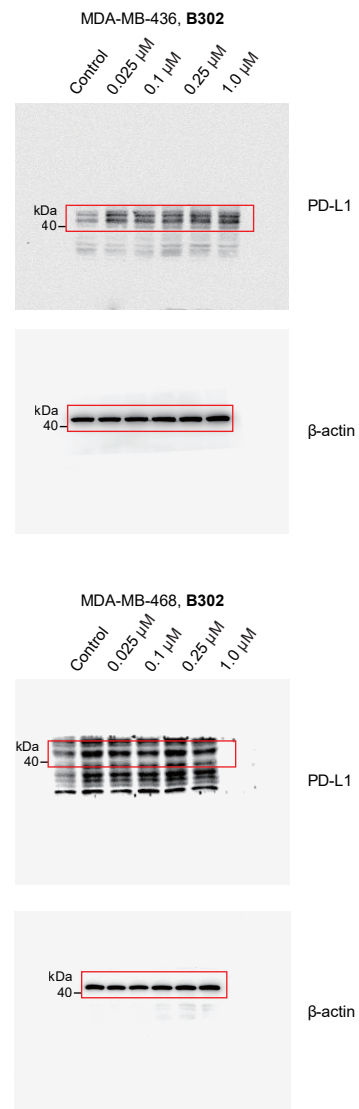

Supplement: 41419_2023_6303_MOESM2_ESM.pdf [file 41419_2023_6303_MOESM2_ESM.pdf]
